# Supplementary material for: Assessing Pediatric Inter-Hospital Transfer: A single-center, Retrospective, Observational Study of Saudi Arabia’s National Life-Saving Protocol
Source: PubMed Central journal article supplement (PMC9879325; doi:10.26502/jppch.74050130), 2022-08-28
Supplement: NIHMS1863212-supplement-1.pdf [file NIHMS1863212-supplement-1.pdf]

نموذج تقييم حالة انقاذ الحياه LIFE / ORGAN SAVINGS FORM

|                                                                                                                                                                                                                                                                                                                                                                                                                                                                                 |                                                                                                                                                                                                                                                                                                                                                                                                               |                                                                                                                                                                                                                                                                                                                                                                                                                                                                                                                                                                                                                                                                                                                                                                                                                                                      |                                                                                                                                                                                                                                                                                                                                                                                                                                                                                                                                                                   |                        |                              |                             |              |                              |                             |                      |                              |                             |            |                              |                             |                      |                              |                             |                   |                              |                             |
|---------------------------------------------------------------------------------------------------------------------------------------------------------------------------------------------------------------------------------------------------------------------------------------------------------------------------------------------------------------------------------------------------------------------------------------------------------------------------------|---------------------------------------------------------------------------------------------------------------------------------------------------------------------------------------------------------------------------------------------------------------------------------------------------------------------------------------------------------------------------------------------------------------|------------------------------------------------------------------------------------------------------------------------------------------------------------------------------------------------------------------------------------------------------------------------------------------------------------------------------------------------------------------------------------------------------------------------------------------------------------------------------------------------------------------------------------------------------------------------------------------------------------------------------------------------------------------------------------------------------------------------------------------------------------------------------------------------------------------------------------------------------|-------------------------------------------------------------------------------------------------------------------------------------------------------------------------------------------------------------------------------------------------------------------------------------------------------------------------------------------------------------------------------------------------------------------------------------------------------------------------------------------------------------------------------------------------------------------|------------------------|------------------------------|-----------------------------|--------------|------------------------------|-----------------------------|----------------------|------------------------------|-----------------------------|------------|------------------------------|-----------------------------|----------------------|------------------------------|-----------------------------|-------------------|------------------------------|-----------------------------|
| <p>يتم تعبئة الجزء بواسطة الطبيب مرسل الحالة :</p>                                                                                                                                                                                                                                                                                                                                                                                                                              |                                                                                                                                                                                                                                                                                                                                                                                                               |                                                                                                                                                                                                                                                                                                                                                                                                                                                                                                                                                                                                                                                                                                                                                                                                                                                      |                                                                                                                                                                                                                                                                                                                                                                                                                                                                                                                                                                   |                        |                              |                             |              |                              |                             |                      |                              |                             |            |                              |                             |                      |                              |                             |                   |                              |                             |
| <p>Fill by sender doctors :</p>                                                                                                                                                                                                                                                                                                                                                                                                                                                 |                                                                                                                                                                                                                                                                                                                                                                                                               |                                                                                                                                                                                                                                                                                                                                                                                                                                                                                                                                                                                                                                                                                                                                                                                                                                                      |                                                                                                                                                                                                                                                                                                                                                                                                                                                                                                                                                                   |                        |                              |                             |              |                              |                             |                      |                              |                             |            |                              |                             |                      |                              |                             |                   |                              |                             |
| <p>Patient Name : ..... Age : ..... Gender : ..... Nationality : ..... File no : .....</p>                                                                                                                                                                                                                                                                                                                                                                                      |                                                                                                                                                                                                                                                                                                                                                                                                               |                                                                                                                                                                                                                                                                                                                                                                                                                                                                                                                                                                                                                                                                                                                                                                                                                                                      |                                                                                                                                                                                                                                                                                                                                                                                                                                                                                                                                                                   |                        |                              |                             |              |                              |                             |                      |                              |                             |            |                              |                             |                      |                              |                             |                   |                              |                             |
| <p><b>CNS</b><br/>الأعصاب</p> <ul style="list-style-type: none"> <li><input type="checkbox"/> Subarachnoid Hemorrhage</li> <li><input type="checkbox"/> Posterior Fossa Tumor</li> <li><input type="checkbox"/> Posterior Fossa Hemorrhage</li> <li><input type="checkbox"/> Acute Shock</li> <li><input type="checkbox"/> Status Epilepticus</li> <li><input type="checkbox"/> Incomplete Spinal Cord Injury</li> <li><input type="checkbox"/> Severe Head Injuries</li> </ul> | <p><b>CARDIO VASCULAR</b><br/>القلب والأوعية الدموية</p> <ul style="list-style-type: none"> <li><input type="checkbox"/> Acute Ischemic Limb</li> <li><input type="checkbox"/> Cardiac Tamponade</li> <li><input type="checkbox"/> Acute Coronary Syndrome / Myocardial Infarction</li> <li><input type="checkbox"/> Ventricular Arrhythmia</li> <li><input type="checkbox"/> Complete Heart Block</li> </ul> | <p><b>PEDIATRICS</b><br/>الأطفال</p> <ul style="list-style-type: none"> <li><input type="checkbox"/> Paediatric Acute Renal Failure</li> <li><input type="checkbox"/> Inborn Error of Metabolism</li> <li><input type="checkbox"/> Severe Septic Shock</li> <li><input type="checkbox"/> DKA with altered level of consciousness</li> <li><input type="checkbox"/> Massive Intra-Abdominal Bleeding</li> <li><input type="checkbox"/> Acute Respiratory Distress Syndrome need high frequency ventilation.</li> <li><input type="checkbox"/> Volvulus / Malrotation</li> <li><input type="checkbox"/> Necrotizing Enterocolitis</li> <li><input type="checkbox"/> Tracheoesophageal Fistula</li> <li><input type="checkbox"/> Diaphragmatic Hernia</li> </ul>                                                                                        | <p><b>OTHERS</b><br/>اخرى</p> <ul style="list-style-type: none"> <li><input type="checkbox"/> Addisonian Crisis</li> <li><input type="checkbox"/> Thyroid storm</li> <li><input type="checkbox"/> Hepatic Encephalopathy</li> <li><input type="checkbox"/> Septic Shock</li> <li><input type="checkbox"/> Obstructive shock (e.g. Massive Pulmonary Embolism)</li> <li><input type="checkbox"/> Acute angle-closure Glaucoma</li> <li><input type="checkbox"/> Orbital Perforation or Penetration</li> <li><input type="checkbox"/> Retinal Detachment</li> </ul> |                        |                              |                             |              |                              |                             |                      |                              |                             |            |                              |                             |                      |                              |                             |                   |                              |                             |
| <p><b>OB/ GYNAE</b><br/>التساء والولادة</p> <ul style="list-style-type: none"> <li><input type="checkbox"/> Severe Obstetric Hemorrhage</li> <li><input type="checkbox"/> Severe Eclampsia</li> <li><input type="checkbox"/> Ovarian Torsion</li> </ul>                                                                                                                                                                                                                         | <p><b>SURGICAL</b><br/>الجراحة</p> <ul style="list-style-type: none"> <li><input type="checkbox"/> Splenic Rupture</li> <li><input type="checkbox"/> Liver Laceration</li> <li><input type="checkbox"/> Ischemic Bowel</li> <li><input type="checkbox"/> Testicular Torsion</li> <li><input type="checkbox"/> Priapism</li> </ul>                                                                             | <p><b>Services Available in the Hospital/ during transfer</b><br/>الخدمات المتوفرة في المستشفى وثناء نقل الحالة</p> <table border="0"> <tr> <td>Mechanical ventilation</td> <td><input type="checkbox"/> Yes</td> <td><input type="checkbox"/> No</td> </tr> <tr> <td>With doctors</td> <td><input type="checkbox"/> Yes</td> <td><input type="checkbox"/> No</td> </tr> <tr> <td>ICU bed Availability</td> <td><input type="checkbox"/> Yes</td> <td><input type="checkbox"/> No</td> </tr> <tr> <td>Nurse only</td> <td><input type="checkbox"/> Yes</td> <td><input type="checkbox"/> No</td> </tr> <tr> <td>OR Room Availability</td> <td><input type="checkbox"/> Yes</td> <td><input type="checkbox"/> No</td> </tr> <tr> <td>Specialty Doctors</td> <td><input type="checkbox"/> Yes</td> <td><input type="checkbox"/> No</td> </tr> </table> |                                                                                                                                                                                                                                                                                                                                                                                                                                                                                                                                                                   | Mechanical ventilation | <input type="checkbox"/> Yes | <input type="checkbox"/> No | With doctors | <input type="checkbox"/> Yes | <input type="checkbox"/> No | ICU bed Availability | <input type="checkbox"/> Yes | <input type="checkbox"/> No | Nurse only | <input type="checkbox"/> Yes | <input type="checkbox"/> No | OR Room Availability | <input type="checkbox"/> Yes | <input type="checkbox"/> No | Specialty Doctors | <input type="checkbox"/> Yes | <input type="checkbox"/> No |
| Mechanical ventilation                                                                                                                                                                                                                                                                                                                                                                                                                                                          | <input type="checkbox"/> Yes                                                                                                                                                                                                                                                                                                                                                                                  | <input type="checkbox"/> No                                                                                                                                                                                                                                                                                                                                                                                                                                                                                                                                                                                                                                                                                                                                                                                                                          |                                                                                                                                                                                                                                                                                                                                                                                                                                                                                                                                                                   |                        |                              |                             |              |                              |                             |                      |                              |                             |            |                              |                             |                      |                              |                             |                   |                              |                             |
| With doctors                                                                                                                                                                                                                                                                                                                                                                                                                                                                    | <input type="checkbox"/> Yes                                                                                                                                                                                                                                                                                                                                                                                  | <input type="checkbox"/> No                                                                                                                                                                                                                                                                                                                                                                                                                                                                                                                                                                                                                                                                                                                                                                                                                          |                                                                                                                                                                                                                                                                                                                                                                                                                                                                                                                                                                   |                        |                              |                             |              |                              |                             |                      |                              |                             |            |                              |                             |                      |                              |                             |                   |                              |                             |
| ICU bed Availability                                                                                                                                                                                                                                                                                                                                                                                                                                                            | <input type="checkbox"/> Yes                                                                                                                                                                                                                                                                                                                                                                                  | <input type="checkbox"/> No                                                                                                                                                                                                                                                                                                                                                                                                                                                                                                                                                                                                                                                                                                                                                                                                                          |                                                                                                                                                                                                                                                                                                                                                                                                                                                                                                                                                                   |                        |                              |                             |              |                              |                             |                      |                              |                             |            |                              |                             |                      |                              |                             |                   |                              |                             |
| Nurse only                                                                                                                                                                                                                                                                                                                                                                                                                                                                      | <input type="checkbox"/> Yes                                                                                                                                                                                                                                                                                                                                                                                  | <input type="checkbox"/> No                                                                                                                                                                                                                                                                                                                                                                                                                                                                                                                                                                                                                                                                                                                                                                                                                          |                                                                                                                                                                                                                                                                                                                                                                                                                                                                                                                                                                   |                        |                              |                             |              |                              |                             |                      |                              |                             |            |                              |                             |                      |                              |                             |                   |                              |                             |
| OR Room Availability                                                                                                                                                                                                                                                                                                                                                                                                                                                            | <input type="checkbox"/> Yes                                                                                                                                                                                                                                                                                                                                                                                  | <input type="checkbox"/> No                                                                                                                                                                                                                                                                                                                                                                                                                                                                                                                                                                                                                                                                                                                                                                                                                          |                                                                                                                                                                                                                                                                                                                                                                                                                                                                                                                                                                   |                        |                              |                             |              |                              |                             |                      |                              |                             |            |                              |                             |                      |                              |                             |                   |                              |                             |
| Specialty Doctors                                                                                                                                                                                                                                                                                                                                                                                                                                                               | <input type="checkbox"/> Yes                                                                                                                                                                                                                                                                                                                                                                                  | <input type="checkbox"/> No                                                                                                                                                                                                                                                                                                                                                                                                                                                                                                                                                                                                                                                                                                                                                                                                                          |                                                                                                                                                                                                                                                                                                                                                                                                                                                                                                                                                                   |                        |                              |                             |              |                              |                             |                      |                              |                             |            |                              |                             |                      |                              |                             |                   |                              |                             |
| <p>Note : ملاحظات إضافية</p>                                                                                                                                                                                                                                                                                                                                                                                                                                                    |                                                                                                                                                                                                                                                                                                                                                                                                               |                                                                                                                                                                                                                                                                                                                                                                                                                                                                                                                                                                                                                                                                                                                                                                                                                                                      |                                                                                                                                                                                                                                                                                                                                                                                                                                                                                                                                                                   |                        |                              |                             |              |                              |                             |                      |                              |                             |            |                              |                             |                      |                              |                             |                   |                              |                             |
| <p>.....</p>                                                                                                                                                                                                                                                                                                                                                                                                                                                                    |                                                                                                                                                                                                                                                                                                                                                                                                               |                                                                                                                                                                                                                                                                                                                                                                                                                                                                                                                                                                                                                                                                                                                                                                                                                                                      |                                                                                                                                                                                                                                                                                                                                                                                                                                                                                                                                                                   |                        |                              |                             |              |                              |                             |                      |                              |                             |            |                              |                             |                      |                              |                             |                   |                              |                             |
| <p>Referred Physician Name : ..... Sing : ..... Date : / / Time: .....</p>                                                                                                                                                                                                                                                                                                                                                                                                      |                                                                                                                                                                                                                                                                                                                                                                                                               |                                                                                                                                                                                                                                                                                                                                                                                                                                                                                                                                                                                                                                                                                                                                                                                                                                                      |                                                                                                                                                                                                                                                                                                                                                                                                                                                                                                                                                                   |                        |                              |                             |              |                              |                             |                      |                              |                             |            |                              |                             |                      |                              |                             |                   |                              |                             |
| <p>يتم تعبئة هذا الجزء بواسطة الطبيب مستقبل الحالة :</p>                                                                                                                                                                                                                                                                                                                                                                                                                        |                                                                                                                                                                                                                                                                                                                                                                                                               |                                                                                                                                                                                                                                                                                                                                                                                                                                                                                                                                                                                                                                                                                                                                                                                                                                                      |                                                                                                                                                                                                                                                                                                                                                                                                                                                                                                                                                                   |                        |                              |                             |              |                              |                             |                      |                              |                             |            |                              |                             |                      |                              |                             |                   |                              |                             |
| <p>Fill up by Receiving doctors :</p>                                                                                                                                                                                                                                                                                                                                                                                                                                           |                                                                                                                                                                                                                                                                                                                                                                                                               |                                                                                                                                                                                                                                                                                                                                                                                                                                                                                                                                                                                                                                                                                                                                                                                                                                                      |                                                                                                                                                                                                                                                                                                                                                                                                                                                                                                                                                                   |                        |                              |                             |              |                              |                             |                      |                              |                             |            |                              |                             |                      |                              |                             |                   |                              |                             |
| <p><input type="checkbox"/> Use Correct (Life Saving) protocol</p>                                                                                                                                                                                                                                                                                                                                                                                                              |                                                                                                                                                                                                                                                                                                                                                                                                               | <p>استخدام صحيح لاتدقيقه نقل الحالات انقاذ الحياه</p>                                                                                                                                                                                                                                                                                                                                                                                                                                                                                                                                                                                                                                                                                                                                                                                                |                                                                                                                                                                                                                                                                                                                                                                                                                                                                                                                                                                   |                        |                              |                             |              |                              |                             |                      |                              |                             |            |                              |                             |                      |                              |                             |                   |                              |                             |
| <p><input type="checkbox"/> Miss Use (Life Saving) Protocol</p>                                                                                                                                                                                                                                                                                                                                                                                                                 |                                                                                                                                                                                                                                                                                                                                                                                                               | <p>استخدام خاطئ لاتدقيقه نقل الحالات انقاذ الحياه</p>                                                                                                                                                                                                                                                                                                                                                                                                                                                                                                                                                                                                                                                                                                                                                                                                |                                                                                                                                                                                                                                                                                                                                                                                                                                                                                                                                                                   |                        |                              |                             |              |                              |                             |                      |                              |                             |            |                              |                             |                      |                              |                             |                   |                              |                             |
| <p>Incident type : نوع الواقعة : .....</p>                                                                                                                                                                                                                                                                                                                                                                                                                                      |                                                                                                                                                                                                                                                                                                                                                                                                               |                                                                                                                                                                                                                                                                                                                                                                                                                                                                                                                                                                                                                                                                                                                                                                                                                                                      |                                                                                                                                                                                                                                                                                                                                                                                                                                                                                                                                                                   |                        |                              |                             |              |                              |                             |                      |                              |                             |            |                              |                             |                      |                              |                             |                   |                              |                             |
| <p>Received Physician Name : ..... Sing : ..... Date : / / Time: .....</p>                                                                                                                                                                                                                                                                                                                                                                                                      |                                                                                                                                                                                                                                                                                                                                                                                                               |                                                                                                                                                                                                                                                                                                                                                                                                                                                                                                                                                                                                                                                                                                                                                                                                                                                      |                                                                                                                                                                                                                                                                                                                                                                                                                                                                                                                                                                   |                        |                              |                             |              |                              |                             |                      |                              |                             |            |                              |                             |                      |                              |                             |                   |                              |                             |

Supplement 1: Life-saving form.

| سياسة إحالة مرضى حالات إنقاذ حياة/عضو بين المستويات الصحية |                    |                    | عنوان السياسة                 |                |
|------------------------------------------------------------|--------------------|--------------------|-------------------------------|----------------|
| مستوى السياسة                                              | يستبدل السياسة رقم | رقم السياسة        | جهة الإصدار                   |                |
| التجمع الصحي                                               | جديد               | C3-EHT-PP-002-A-V1 | إدارة التنسيق للإحالات الطبية |                |
| تطبيق على                                                  | عدد الصفحات        | تاريخ المراجعة     | تاريخ التطبيق                 | تاريخ الاعتماد |
| أقسام التنسيق للإحالات الطبية بالمستشفيات                  | 2                  | 10-03-2020         | 01-04-2020                    | 15-03-2020     |

#### ١. الغرض:

1.1: تحديد سياسات وإجراءات تنظيم عمل إحالة مرضى إنقاذ حياة/عضو بين المستويات الصحية داخل وخارج منطقة القصيم.

#### ٢. التعريفات:

2.1: حالات إنقاذ الحياة/عضو : الحالات المهددة لحياة المريض أو عضو من أعضائه وتحتاج لخدمة طبية عاجلة أو تدخل طبي أو جراحي معين لا يمكن توفيره بنفس المستشفى المتواجد به المريض.

#### ٣. السياسات:

3.1: سياسة العمل للحالات إنقاذ حياة/عضو بين المستشفيات.

#### الإجراءات :

#### 4.1: إجراءات الطبيب المحيل :

- 4.1.1: إذا قرر الطبيب المعالج نقل حاله إنقاذ حياة/عضو إلى أي مستشفى آخر تتوفر فيه الخدمة فإنه يقوم بالاتصال على مركز ١٩٣٧ لأخذ الموافقة من عديمها وتدوين اسم الطبيب المناوب في المركز.
- 4.1.2: في حاله موافقة مركز ١٩٣٧ يقوم الطبيب المعالج بإعداد التقرير الطبي بالنموذج الموحد للحالة إنقاذ حياة/عضو موضحا سبب الإحالة وتسليمه إلى قسم التنسيق للإحالات الطبية بالمستشفى .
- 4.1.3: يرفق الطبيب مع التقرير كل المرفقات المطلوبة. مثل (نموذج إنقاذ الحياة المعتمد من قبل وزارة الصحة- معلومات المريض - صورة الهوية - نتائج الأشعة والتحليل أن وجد).

#### إجراءات المستشفى المحيل:

- 4.1.1.1: يقوم المنسق الطبي فور استلام المستندات بالتأكد من صحتها واكتمالها وعمل مسح ضوئي بصيغة pdf.
- 4.1.1.2: الاتصال بعملية التنسيق الطبي بالتجمع الصحي لإخذ توجيه من الطبيب المناوب بالمستشفى الذي يستقبل الحالة.
- 4.1.1.3: اختيار نوع الحالة (إنقاذ حياة/عضو) في (نظام التحويل الإلكتروني - إحالتي) وتعبئة البيانات المطلوبة مع ضرورة كتابة اسم الطبيب المناوب في مركز ١٩٣٧ الذي سيجب نقل الحالة في خانة السبب التفصيلي للإحالة.
- 4.1.1.4: اختيار التخصص المطلوب والتخصص الدقيق بدقه حسب التقرير الطبي وإرفاق المستندات التي تم مسحها بصيغة pdf.
- 4.1.1.5: يقوم المنسق الطبي بتأكيد النقل عبر برنامج إحالتي والإشراف على نقل الحالة بالتنسيق بين النقل الإسعافي وإدارة التمريض والطبيب المعالج وحل المعوقات إلى إن تصل إلى المستشفى المستقبل.

#### إجراءات المستشفى المستقبل:

- 4.1.2.1: يقوم المنسق الطبي بالمستشفى المستقبل فور استلام الطلب بطباعة المستندات المرفقة وتسليمها لقسم الطوارئ والطبيب المختص .
- 4.1.2.2: يلتزم قسم الطوارئ بإشعار قسم التنسيق للإحالات الطبية بوصول المريض ويتم تأكيد الوصول عبر برنامج إحالتي.

| سياسة إحالة مرضى حالات إنقاذ حياة/عضو بين المستويات الصحية |                    |                    |                               | عنوان السياسة  |  |
|------------------------------------------------------------|--------------------|--------------------|-------------------------------|----------------|--|
| مستوى السياسة                                              | يستبدل السياسة رقم | رقم السياسة        | جهة الإصدار                   |                |  |
| التجمع الصحي                                               | جديد               | C3-EHT-PP-002-A-V1 | إدارة التنسيق للإحالات الطبية |                |  |
| تطبق على                                                   | عدد الصفحات        | تاريخ المراجعة     | تاريخ التطبيق                 | تاريخ الاعتماد |  |
| أقسام التنسيق للإحالات الطبية بالمستشفيات                  | 2                  | 10-03-2020         | 01-04-2020                    | 15-03-2020     |  |

4.1.3.3: يقوم المنسق الطبي بالإشراف على وصول الحالة وحل أي معوقات تواجه المريض أو الطاقم المرافق وإنهاء جميع إجراءات الطاقم المرافق (توقيع الانتدابيات وختمها).

4.1.3.4: في حال اتضح للطبيب الذي استقبل الحالة أنها ليست إنقاذ حياة/عضو أو أن حالة المريض غير متطابقة تماما مع التقرير الطبي يتم تعبئة نموذج التغذية الراجعة (feed back) وإرفاقه بالمرفقات الإضافية للإحالة وإبلاغ إدارة التنسيق بالتجمع الصحي بذلك.

4.1.3.4: يلتزم قسم التنسيق للإحالات الطبية بالمستشفى المستقبل الإبلاغ عن حالة المريض وماذا تم بخصوصه بعد مضي ٢٤ ساعة وذلك بالمرفقات الإضافية للإحالة.

#### ٤. المرفقات :

- ١- التقرير الطبي على أن يكون في النموذج الموحد المعتمد من الوزارة.
- ٢- الهوية الوطنية.
- ٣- استمارة معلومات المريض.

#### ٥. المراجع :

- ١- دليل سياسات وإجراءات العمل بإدارة أهلية العلاج والتنسيق الطبي بصحة القصيم تاريخ ١٦-٠٥-٢٠١٨م.
- ٢- لجنة مراجعة سياسات وإجراءات العمل بصحة القصيم تاريخ / ١٢-٠٩-٢٠١٩م ورقم / ٣٨٠٤٣٨.
- ٣- التجارب الإقليمية والعالمية: بريطانيا، السويد، هولندا، منظمة الصحة العالمية.
- ٤- تجريره مستشفى الملك فيصل التخصصي ومركز الأبحاث بالرياض.
- ٥- دليل نظام الإحالة بين المرافق الصحية: الإدارة العامة للمستشفيات ٢٠٠٨م.

#### ٦. الاعتماد

##### الإعداد:

| الاسم                   | المسمى الوظيفي              | التوقيع | تاريخ |
|-------------------------|-----------------------------|---------|-------|
| شليوبع عطاءالله المطيري | رئيس قسم التنسيق الطبي      |         |       |
| د. فتح الرحمن بشارة     | المشرف الفني بإدارة التنسيق |         |       |

##### المراجعة:

| الاسم                    | المسمى الوظيفي                     | التوقيع | تاريخ |
|--------------------------|------------------------------------|---------|-------|
| محمد رشيد الرويلي        | مدير إدارة التنسيق للإحالات الطبية |         |       |
| د. عبدالاله محمد الحديثي | نائب الرئيس التنفيذي لرعاية الصحية |         |       |

##### الاعتماد:

| الاسم                | المسمى الوظيفي  | التوقيع | تاريخ |
|----------------------|-----------------|---------|-------|
| د. سلطان سعود الشايع | الرئيس التنفيذي |         |       |

| Hospital name                         | Frequency | Percent |
|---------------------------------------|-----------|---------|
| BCH (Buriadah City)                   | 25        | 21.2    |
| BUKAREA HOSPITAL (Bukariah city)      | 23        | 19.5    |
| ALRASS HOSPITAL (Alrass City)         | 16        | 13.6    |
| KFSH (Buridah City)                   | 11        | 9.3     |
| ALASYAH HOSPITAL (Alasyah City)       | 7         | 5.9     |
| KING SAUD HOSPITAL ( UNAZIA City)     | 7         | 5.9     |
| QIBA HOSPITAL (Qiba City)             | 6         | 5.1     |
| QUSABIA HOSPITAL Qusabah city)        | 5         | 4.2     |
| UYON ALJIWA HOSPITAL (Aljiwa City )   | 4         | 3.4     |
| PHC                                   | 3         | 2.5     |
| ALMOTHNAB HOSPITAL (Almothnab City)   | 3         | 2.5     |
| ALQUARA HOSPITAL                      | 3         | 2.5     |
| KKH,HAIL (Hail City )                 | 2         | 1.7     |
| MCH HAIL (Hail City)                  | 1         | 0.8     |
| ALBDAYE HOSPITAL (Albdaye city)       | 1         | 0.8     |
| ALNABHANEH HOSPITAL (Alnabhaneh city) | 1         | 0.8     |
| Total                                 | 118       | 100.0   |

**Supplement 3:** Distribution of patients arrived via the protocol as per referral hospital.

| Patients Characteristics and group |                          | ICU admission |    | Total | OR                     | 95% CI               | P value            |
|------------------------------------|--------------------------|---------------|----|-------|------------------------|----------------------|--------------------|
|                                    |                          | Yes           | No |       |                        |                      |                    |
| Age Group                          | 3 months or less         | 9             | 6  | 15    | 0.3750<br>to<br>3.7500 | 0.0333<br>to 14.6170 | 0.0953<br>(> 0.05) |
|                                    | >3 to 6 months           | 4             | 1  | 5     |                        |                      |                    |
|                                    | >6 to 12 months          | 4             | 8  | 12    |                        |                      |                    |
|                                    | > 12 months to 24 months | 4             | 10 | 14    |                        |                      |                    |
|                                    | > 24 months              | 22            | 50 | 72    |                        |                      |                    |
| Gender                             | Males                    | 24            | 44 | 68    | 0.89                   | 0.4173 to 1.8978     | 0.456              |
|                                    | Females                  | 19            | 31 | 50    |                        |                      |                    |
| Time-of-referral                   | > 8:00 to 16:00          | 12            | 22 | 34    | 0.7969                 | 0.3252 to 1.9528     | 0.6195             |
|                                    | > 16:00 to 00:00         | 17            | 32 | 49    |                        |                      |                    |
|                                    | 00:00 to 8:00 AM         | 14            | 21 | 35    |                        |                      |                    |
| Weekend Arrival/admission          | Yes                      | 12            | 20 | 32    | 1.0645                 | 0.4595 to 2.4664     | 0.524              |
|                                    | No                       | 31            | 55 | 86    |                        |                      |                    |
| Ventilation                        | Not ventilated           | 34            | 58 | 92    | 0.806                  | 0.2952 to 2.2005     | 0.421              |
|                                    | Ventilated               | 8             | 11 | 19    |                        |                      |                    |
|                                    | Not recorded             | 1             | 6  | 7     |                        |                      |                    |
| CPR                                | No CPR                   | 39            | 66 | 105   | 0.5909                 | 0.1136 to 3.0724     | 0.5317             |
|                                    | Yes                      | 3             | 3  | 6     |                        |                      |                    |
|                                    | Not recorded             | 1             | 6  | 7     |                        |                      |                    |
| Involved System                    | CNS                      | 13            | 21 | 34    | 1.3619<br>to<br>4.3953 | 0.4919 to 3.7709     | 0.5522<br>(>0.05)  |
|                                    | RESPIRATORY              | 10            | 22 | 32    |                        |                      |                    |

|            |            |    |    |     |        |                  |        |
|------------|------------|----|----|-----|--------|------------------|--------|
|            | GIT        | 3  | 13 | 16  |        |                  |        |
|            | MULTIORGAN | 5  | 6  | 11  |        |                  |        |
|            | HEMATOLOGY | 3  | 7  | 10  |        |                  |        |
|            | Endocrine  | 7  | 1  | 8   |        |                  |        |
|            | RTA        | 2  | 2  | 4   |        |                  |        |
|            | SURGICAL   | 0  | 3  | 3   |        |                  |        |
| Alive/Dead | Alive      | 36 | 74 | 110 | 0.0695 | 0.0082 to 0.5865 | 0.0143 |
|            | Dead       | 7  | 1  | 8   |        |                  |        |
| Total      |            | 43 | 75 | 118 |        |                  |        |

ICU admission Cross tabulation and referring hospital, age group, Time of referral, patient status, and organ system involved

**Supplement 4:** Multivariable logistic regression for PICU admission.

| Patients Characteristics and group |                          | Alive | Dead | Total | OR           | 95% CI            | P value |
|------------------------------------|--------------------------|-------|------|-------|--------------|-------------------|---------|
| Age Group                          | 3 months or less         | 12    | 3    | 15    | 0.1429<br>to | 0.0067 to 3.0627  | 0.249   |
|                                    | >3 to 6 months           | 5     | 0    | 5     | 0.2353       |                   |         |
|                                    | >6 to 12 months          | 12    | 0    | 12    |              |                   |         |
|                                    | > 12 months to 24 months | 13    | 1    | 14    |              |                   |         |
|                                    | > 24 months              | 68    | 4    | 72    |              |                   |         |
| Gender                             | Males                    | 65    | 3    | 68    | 2.2569       | 0.5142 to 9.9066  | 0.2808  |
|                                    | Females                  | 45    | 5    | 50    |              |                   |         |
| Time-of-admission                  | > 8:00 to 16:00          | 31    | 3    | 34    | 0.9293       | 0.1470 to 5.8763  | 0.9379  |
|                                    | > 16:00 to 00:00         | 46    | 3    | 49    |              |                   |         |
|                                    | 00:00 to 8:00 AM         | 33    | 2    | 35    |              |                   |         |
| Weekend Arrival/admission          | Yes                      | 31    | 1    | 32    | 2.7468       | 0.3244 to 23.2558 | 0.3539  |
|                                    | No                       | 79    | 7    | 86    |              |                   |         |
| ventilation                        | Not ventilated           | 85    | 7    | 92    | 0.6746       | 0.0781 to 5.8271  | 0.7205  |
|                                    | Ventilated               | 18    | 1    | 19    |              |                   |         |
|                                    | Not recorded             | 7     | 0    | 7     |              |                   |         |
| CPR                                | No CPR                   | 97    | 8    | 105   | 0.8824       | 0.0457 to 17.0390 | 0.934   |
|                                    | Yes                      | 6     | 0    | 6     |              |                   |         |
|                                    | Not recorded             | 7     | 0    | 7     |              |                   |         |
| ICU admission                      | Yes                      | 36    | 7    | 43    | 0.0695       | 0.0082 to 0.5865  | 0.0143  |
|                                    | No                       | 74    | 1    | 75    |              |                   |         |
| Involved System                    | CNS                      | 31    | 3    | 34    | 0.2727       | 0.0133            | 0.3995  |
|                                    | RESPIRATORY              | 32    | 0    | 32    | to           | to                |         |
|                                    | GIT                      | 16    | 0    | 16    | 3.875        | 22.9575           |         |
|                                    | MULTIORGAN               | 8     | 3    | 11    |              |                   |         |
|                                    | HEMATOLOGY               | 9     | 1    | 10    |              |                   |         |
|                                    | Endocrine                | 8     | 0    | 8     |              |                   |         |
|                                    | RTA                      | 3     | 1    | 4     |              |                   |         |
|                                    | SURGICAL                 | 3     | 0    | 3     |              |                   |         |

|            |     |     |   |     |        |                  |        |
|------------|-----|-----|---|-----|--------|------------------|--------|
| Alive/Dead | Yes | 36  | 7 | 43  | 0.0695 | 0.0082 to 0.5865 | 0.0143 |
|            | No  | 74  | 1 | 75  |        |                  |        |
| Total      |     | 110 | 8 | 118 |        |                  |        |

Mortality Cross tabulation and, age group, Time of referral, patient status, and organ system involved.

**Supplement 5:** Multivariable logistic regression for mortality.
